# Supplementary material
Source: publisher figshare collection journal article supplement (https://gsapubs.figshare.com/articles/dataset/_/21218183)
Supplement: Supplementary file 1 [file 2]

## Sheet: Sheet1
Bishop, B.T., Cho, S., Warren, L., Soto-Cordero, L., Pedraza, P., Prieto, G.A., and Dionicio, V., 2022, Oceanic intraplate faulting as a pathway for deep hydration of the lithosphere: Perspectives from the Caribbean: Geosphere, v. 18, https://doi.org/10.1130/GES02534.1.
Supplemental Table S3. HypoDD Relocations of the Providencia Sequence Using Preferred Velocity Model
Year	Month	Day	Hour	Minute	Second	Magnitude	Longitude	Latitude	Depth	Long. Err.	Lat. Err.	Depth Err.
						(Ml,Mw)	(°W)	(°N)	(km)	(km)	(km)	(km)
2018	11	21	5	37	40.62	2.9	81.2356	13.1486	16.646	1.0025	0.9968	1.7387
2018	11	25	1	19	6	4.9	81.2028	13.219	12.323	0.6857	0.6784	1.4283
2018	11	25	1	29	25.77	2.2	81.4078	13.5592	43.788	2.2185	2.0871	2.0016
2018	11	25	1	30	45.11	2.1	81.3186	13.3025	25.687	1.0135	0.9391	1.2197
2018	11	25	1	50	32.65	2.1	81.2343	13.2422	16.78	0.9827	0.9536	1.4527
2018	11	25	3	40	49.59	6	81.1675	13.2332	3.23	0.3395	0.3896	0.3136
2018	11	25	3	55	4.79	3.2	81.2481	13.2004	5.769	0.4006	0.3609	0.9617
2018	11	25	3	58	5.78	3.3	81.1983	13.2363	2.339	0.3532	0.3869	0.3241
2018	11	25	4	2	34.61	2.2	81.4633	13.3697	16.455	1.302	1.1495	0.5472
2018	11	25	4	4	35.22	2	81.2238	13.2889	24.028	0.948	0.9106	2.01
2018	11	25	4	5	28.32	2.2	81.4067	13.324	31.803	1.2479	1.0891	1.0036
2018	11	25	4	8	41.85	2.1	81.2242	13.295	18.958	1.164	1.1077	1.7909
2018	11	25	4	11	48.88	3.3	81.1843	13.2405	3.25	0.3127	0.3534	0.2886
2018	11	25	4	13	16.15	3	81.139	13.26	6.801	0.3152	0.4037	0.8653
2018	11	25	4	14	48.58	2.2	81.2777	13.2132	19.798	1.0867	1.0476	1.3305
2018	11	25	4	22	35.39	2.4	81.3981	13.274	21.039	1.1966	1.0755	1.4025
2018	11	25	4	30	38.25	3.1	81.2073	13.2252	4.742	0.336	0.3489	0.8681
2018	11	25	4	39	50.47	2.9	81.1368	13.2388	6.989	0.3511	0.4224	0.9496
2018	11	25	4	43	16.28	3.4	81.2001	13.2473	2.189	0.2915	0.3323	0.3162
2018	11	25	4	45	6.47	3.1	81.2215	13.2123	3.322	0.3754	0.374	0.3288
2018	11	25	4	48	29.27	2.8	81.3244	13.2911	22.896	0.9898	0.9257	1.3282
2018	11	25	4	50	29.78	2.1	81.2343	13.2292	2.866	0.3938	0.3837	0.3996
2018	11	25	4	59	40.29	2.4	81.3305	13.264	19.875	1.196	1.1183	1.8297
2018	11	25	5	3	48.07	2.7	81.2234	13.2192	3.696	0.3464	0.3424	0.8801
2018	11	25	5	7	19.38	2.1	81.3978	13.2626	23.9	1.1667	1.0298	1.3548
2018	11	25	5	10	27.84	2	81.2101	13.3188	28.55	1.2761	1.2373	2.2519
2018	11	25	5	12	19.57	2.3	81.2445	13.248	14.91	0.8881	0.8513	1.4248
2018	11	25	5	16	16.68	4.3	81.2578	13.1937	12.436	0.8611	0.8368	1.509
2018	11	25	5	14	53.37	2.6	81.3144	13.2985	20.412	1.186	1.0933	0.893
2018	11	25	5	15	51.08	3.3	81.1718	13.1961	5.566	0.3746	0.3999	0.9668
2018	11	25	5	23	12.1	2.6	81.2283	13.2037	3.002	0.3897	0.3776	0.3363
2018	11	25	5	28	33.72	4	81.1955	13.2255	3.429	0.3519	0.3794	0.3183
2018	11	25	5	29	8.6	3.4	81.2646	13.2299	10.805	1.5911	0.5416	2.4852
2018	11	25	5	35	18.79	2.3	81.1088	13.2669	10.299	0.7227	0.7655	1.7458
2018	11	25	5	44	1.76	2.1	81.1783	13.2722	14.784	0.8307	0.8061	1.8807
2018	11	25	5	46	11.88	3.2	81.2956	13.2384	19.023	0.9694	0.9245	1.1097
2018	11	25	5	51	47.36	2.4	81.2171	13.1831	11.868	1.5678	0.4487	2.9943
2018	11	25	6	5	1.3	2.4	81.3338	13.2824	20.063	1.2903	1.1987	1.021
2018	11	25	6	8	35.9	3	81.22	13.2256	5.586	0.3539	0.3587	0.9037
2018	11	25	6	14	23.23	2.8	81.2604	13.3103	26.866	1.1449	1.0805	1.7451
2018	11	25	6	15	59.51	3.5	81.2042	13.1737	12.997	1.6181	0.4643	3.1524
2018	11	25	6	18	28.56	2.6	81.2207	13.2962	19.058	1.1738	1.1413	1.3773
2018	11	25	6	25	29.48	2.5	81.4226	13.311	25.815	1.226	1.0659	0.9781
2018	11	25	6	38	16.38	2.6	81.2511	13.2484	10.858	1.9001	0.5045	3.6601
2018	11	25	6	39	40.13	2.7	81.1612	13.2799	11.853	0.6854	0.6964	1.4491
2018	11	25	6	47	33.37	3	81.2011	13.2584	2.247	0.2918	0.3429	0.3215
2018	11	25	6	50	20.87	2.5	81.4123	13.3534	28.175	1.2803	1.1321	0.8988
2018	11	25	6	53	11	3.3	81.2225	13.1998	4.12	0.3869	0.3719	0.9618
2018	11	25	6	54	53.22	3	81.352	13.2675	22.512	1.0608	0.9742	1.4593
2018	11	25	7	0	40.63	2.3	81.2621	13.3685	26.785	0.9617	0.9152	1.1781
2018	11	25	7	9	33.8	2.4	81.3259	13.231	37.373	1.2724	1.1009	1.6232
2018	11	25	7	13	17.04	2.3	81.2777	13.323	29.284	0.9688	0.8979	1.2035
2018	11	25	7	17	21.89	2.3	81.247	13.2415	15.478	0.8249	0.791	1.1419
2018	11	25	7	19	52.45	2.8	81.1365	13.2244	16.759	0.7197	0.7362	1.2922
2018	11	25	7	25	26.71	2.4	81.1067	13.2633	11.814	0.5349	0.5621	1.1936
2018	11	25	7	29	50.74	2.8	81.1229	13.2494	6.673	0.32	0.4116	0.8727
2018	11	25	7	43	25.7	2.4	81.1326	13.2578	5.522	0.3094	0.3977	0.848
2018	11	25	7	54	52.02	2.2	81.1135	13.2646	5.329	0.294	0.4145	0.8685
2018	11	25	8	6	10.3	2.3	81.2032	13.2686	32.523	1.1816	1.1205	2.1341
2018	11	25	8	7	25.76	2.3	81.1569	13.2827	15.644	0.7712	0.7812	1.3259
2018	11	25	8	52	15.87	2.4	81.3286	13.3416	27.323	0.9716	0.8853	0.9374
2018	11	25	9	5	42.52	2.4	81.304	13.2939	24.282	0.9471	0.888	1.2873
2018	11	25	9	33	9.69	2.9	81.1642	13.2651	15.903	0.7134	0.7146	1.2304
2018	11	25	9	42	59.8	2.5	81.2389	13.2617	16.304	0.8052	0.7779	1.1328
2018	11	25	10	6	28.27	2.4	81.1244	13.2608	29.204	2.8915	2.6652	2.5076
2018	11	25	10	9	13.42	2.3	81.2672	13.2201	10.734	1.8946	0.5985	3.1498
2018	11	25	10	16	50.79	2.9	81.2054	13.2215	2.564	0.37	0.3883	0.3311
2018	11	25	10	33	18.68	2.2	81.1347	13.2941	10.912	0.7206	0.7578	1.7311
2018	11	25	10	45	17.22	4.6	81.2352	13.207	5.308	0.3896	0.3659	0.9609
2018	11	25	10	56	52.73	2.1	81.3357	13.3039	25.498	1.1767	1.0641	1.298
2018	11	25	12	1	48.76	2.9	81.1455	13.2367	5.18	0.3347	0.3972	0.9009
2018	11	25	12	26	40.98	2.7	81.411	13.2975	23.57	1.1318	0.9979	1.0232
2018	11	25	12	24	41.04	2.8	81.2	13.1739	4.758	0.4445	0.4366	1.1115
2018	11	25	12	28	23.57	4	81.1787	13.2671	16.771	0.7329	0.7287	1.1579
2018	11	25	12	36	29.32	3	81.2614	13.3342	25.92	0.8503	0.803	1.1757
2018	11	25	12	38	0.44	2.7	81.1953	13.2941	17.721	0.8646	0.8486	1.1179
2018	11	25	12	40	1.82	2.7	81.1258	13.2637	3.234	0.3128	0.431	0.3115
2018	11	25	12	58	15.03	2.2	81.3765	13.3504	30.468	1.1827	1.0651	0.9503
2018	11	25	13	2	9.45	2.5	81.3036	13.2865	25.981	0.918	0.8547	1.2581
2018	11	25	13	21	47.69	2.4	81.2199	13.2306	2.814	0.3485	0.3611	0.3625
2018	11	25	13	30	29.49	2.4	81.1794	13.333	23.092	0.8816	0.877	1.1181
2018	11	25	13	43	17.7	3	81.137	13.2691	12.084	0.6237	0.6432	1.3576
2018	11	25	13	50	18.96	3.1	81.139	13.2772	13.811	0.6887	0.7042	1.3302
2018	11	25	13	54	57.52	2.7	81.1672	13.2787	13.937	1.0762	0.4615	3.1953
2018	11	25	14	11	20.67	2.2	81.4273	13.5053	42.698	2.0585	1.8829	1.6626
2018	11	25	14	14	11.66	2.7	81.1619	13.2691	15.806	0.7084	0.7102	1.2161
2018	11	25	14	18	37.53	3.1	81.1579	13.2633	13.45	0.6546	0.6615	1.2894
2018	11	25	14	14	51.68	2.7	81.5194	13.5277	25.911	2.1438	1.8635	2.6825
2018	11	25	14	22	5.73	2.4	81.4077	13.6491	40.497	3.1187	3.0107	3.5439
2018	11	25	14	26	17.85	2.6	81.3666	13.2314	14.955	1.4407	1.2974	1.5452
2018	11	25	14	31	11.23	3.4	81.1161	13.271	6.801	0.3065	0.4089	0.8377
2018	11	25	15	6	42.34	3.3	81.2814	13.2054	12.442	1.6267	0.5369	2.6146
2018	11	25	15	13	13.38	2.5	81.3656	13.2439	17.001	1.3392	1.2146	1.2368
2018	11	25	15	29	28.99	2.2	81.1751	13.3027	16.612	0.9645	0.9652	1.4529
2018	11	25	15	45	59.73	5.1	81.2684	13.2092	14.311	0.8498	0.8215	1.4186
2018	11	25	15	57	3.92	2.8	81.1855	13.3258	21.739	0.993	0.9803	2.4916
2018	11	25	15	59	9.63	2	81.4503	13.2816	10.196	1.6135	1.1058	1.0326
2018	11	25	16	6	6.19	2.3	81.5988	13.36	8.147	1.9802	1.9915	2.8036
2018	11	25	16	10	15.73	2.3	81.5716	13.3656	8.626	1.7046	1.7487	2.2825
2018	11	25	16	14	15.49	3.2	81.1804	13.133	8.902	1.5618	0.45	3.6246
2018	11	25	16	19	46.35	4.6	81.2408	13.207	3.182	0.3917	0.3701	0.3321
2018	11	25	16	25	46.19	3.4	81.234	13.2117	2.618	0.395	0.3816	0.342
2018	11	25	16	31	17.56	2.1	81.3262	13.3201	22.709	1.1609	1.0682	1.2733
2018	11	25	16	36	56.25	2.3	81.1949	13.2026	3.434	0.4171	0.4343	0.3729
2018	11	25	16	41	59.45	2.5	81.165	13.2311	12.944	0.6699	0.6765	1.3767
2018	11	25	16	45	6.27	3.5	81.193	13.2139	3.82	0.3518	0.3692	0.9083
2018	11	25	16	46	48.79	3.4	81.1841	13.2134	4.465	0.3729	0.3989	0.9727
2018	11	25	17	2	16.09	2.8	81.1265	13.2861	11.606	0.6291	0.657	1.407
2018	11	25	18	15	29.45	2.7	81.1702	13.2318	5.873	0.3177	0.3588	0.8451
2018	11	25	18	38	54.97	2.5	81.2455	13.2237	2.708	0.3381	0.3131	0.3316
2018	11	25	18	50	51.82	3.2	81.1826	13.2085	0.935	0.483	0.5208	0.4373
2018	11	25	18	55	6.41	3.2	81.1542	13.2384	2.754	0.3246	0.3972	0.3068
2018	11	25	19	38	16.77	2.2	81.3529	13.3983	33.557	1.2227	1.1147	0.977
2018	11	25	20	3	3.26	3	81.1855	13.2151	6.164	0.3315	0.3541	0.8605
2018	11	25	20	56	37.23	5.7	81.1206	13.2939	14.429	0.6243	0.6444	1.1713
2018	11	25	21	2	27.12	3.2	81.1188	13.2689	15.825	0.6131	0.6303	1.1016
2018	11	25	21	8	27.83	2.8	81.1043	13.289	15.544	0.6539	0.6787	1.1856
2018	11	25	21	12	51.17	3.7	81.0914	13.2619	13.4	0.6728	0.709	1.4073
2018	11	25	21	16	55.47	2.9	81.0625	13.2667	9.246	0.5829	0.6407	1.51
2018	11	25	21	29	44.19	3.8	81.0915	13.3009	12.257	0.6029	0.6403	1.2871
2018	11	25	21	34	49.14	2.7	81.198	13.2552	20.977	0.9444	0.9194	2.4427
2018	11	25	21	40	46.54	3.5	81.0761	13.2623	4.443	0.3269	0.4751	0.9539
2018	11	25	21	44	56.78	2.9	81.0966	13.2604	10.413	0.5421	0.5784	1.3186
2018	11	25	21	52	24.03	3.1	81.1253	13.2485	6.977	0.3174	0.4062	0.8669
2018	11	25	22	0	42.81	2.7	81.1129	13.2538	11.862	1.1402	0.4673	3.1904
2018	11	25	22	1	25.62	3.4	81.1603	13.2466	14.112	0.6571	0.664	1.2591
2018	11	25	22	3	19.8	2.7	81.1265	13.2906	15.3	0.6892	0.7076	1.2507
2018	11	25	22	9	55.3	3.6	81.1013	13.281	4.315	0.2888	0.4185	0.8477
2018	11	25	22	35	31.12	2.6	81.0991	13.241	10.565	0.5225	0.5546	1.2763
2018	11	25	22	44	14.46	3.1	81.2167	13.2268	19.811	0.8684	0.8649	1.5045
2018	11	25	22	55	51.76	3.2	81.1287	13.2723	3.35	0.2962	0.4106	0.2958
2018	11	25	23	25	34.02	2.6	81.1129	13.2784	5.036	0.3184	0.459	0.947
2018	11	25	23	27	0.6	2.5	81.0787	13.2601	9.014	1.023	0.5182	3.1586
2018	11	25	23	43	8.04	2.7	81.1122	13.3086	15.535	0.7438	0.769	1.3144
2018	11	25	23	50	58	3.1	81.0762	13.2684	6.49	0.2844	0.4138	0.8179
2018	11	25	23	56	38.28	2.9	81.1024	13.2832	16.776	0.6463	0.669	1.1131
2018	11	26	0	27	1.55	3	81.1616	13.2254	2.303	0.3368	0.3863	0.3104
2018	11	26	0	39	26.22	2.6	81.1591	13.209	4.413	0.3405	0.3795	0.8954
2018	11	26	0	48	57.75	3	81.0652	13.2635	6.937	0.3115	0.4549	0.8999
2018	11	26	0	50	41.1	2.8	81.0819	13.3139	13.617	0.7678	0.8116	1.4961
2018	11	26	1	4	0.24	2	81.2151	13.3199	18.717	0.8401	0.8117	0.9848
2018	11	26	1	6	35.02	3.1	81.0898	13.2937	7.12	0.3157	0.4686	0.924
2018	11	26	1	8	19.97	2.7	81.1478	13.3085	14.47	0.7094	0.7201	1.2591
2018	11	26	1	15	17.68	2.5	81.0777	13.277	11.555	0.6259	0.6722	1.4347
2018	11	26	1	30	18.62	2.6	81.1553	13.1977	3.408	0.3725	0.4158	0.3372
2018	11	26	1	41	1.41	2.5	81.0809	13.2725	10.65	0.5821	0.6275	1.3977
2018	11	26	1	52	59.85	3	81.181	13.2299	3.239	0.3273	0.3656	0.2998
2018	11	26	1	57	5.24	4.1	81.0835	13.2798	4.447	0.9804	0.4505	2.8742
2018	11	26	2	15	39.73	2.9	81.0794	13.2516	6.232	0.318	0.4552	0.9252
2018	11	26	3	43	5.6	4.8	81.0935	13.294	17.501	0.7206	0.7481	1.2034
2018	11	26	3	51	27.45	3.3	81.0965	13.2858	14.741	0.6302	0.6586	1.1952
2018	11	26	4	3	38.77	2.1	81.4105	13.3193	22.779	1.2215	1.0848	0.9755
2018	11	26	4	11	16.91	2.6	81.1778	13.2472	11.479	0.7612	0.7703	1.6834
2018	11	26	4	14	9.04	2.6	81.193	13.4023	27.502	1.0497	1.0378	1.6947
2018	11	26	4	38	57.49	2.3	81.2191	13.2423	14.834	0.9589	0.9405	1.5127
2018	11	26	4	54	3.9	2.7	81.3104	13.2134	14.32	1.2079	1.1264	1.7134
2018	11	26	5	20	59.69	3.3	81.106	13.2658	6.404	0.2933	0.3912	0.7933
2018	11	26	5	39	25.33	2.4	81.1201	13.3141	16.048	0.791	0.8124	1.3381
2018	11	26	5	48	29.19	2.4	81.43	13.3785	31.322	1.3698	1.2058	0.9192
2018	11	26	6	36	13.65	4.5	81.2596	13.2032	5.297	0.4147	0.3627	0.9799
2018	11	26	6	43	52.62	2.6	81.3237	13.2169	16.09	1.2564	1.1687	1.5832
2018	11	26	6	55	32	3.1	81.2353	13.2115	3.218	0.3798	0.3653	0.326
2018	11	26	7	0	53.06	2.1	81.3857	13.2943	22.784	1.151	1.035	1.1658
2018	11	26	7	4	14	2.9	81.0945	13.2868	13.769	0.6229	0.6544	1.2416
2018	11	26	7	59	24.75	3	81.1033	13.3018	11.265	0.6523	0.6933	1.4687
2018	11	26	8	8	21.9	3	81.198	13.2374	13.238	0.7415	0.7368	1.4068
2018	11	26	8	24	51.31	2.4	81.3658	13.37	35.595	1.2853	1.1469	1.0459
2018	11	26	8	36	0.79	2.1	81.308	13.3974	31.287	1.1724	1.0949	1.0776
2018	11	26	8	55	44.19	2.3	81.1071	13.2582	10.207	0.4968	0.5275	1.2276
2018	11	26	9	6	4.47	3	81.0747	13.2907	13.9	0.6594	0.7002	1.3223
2018	11	26	9	13	12.42	4.9	81.0766	13.2709	3.179	0.3269	0.4718	0.3182
2018	11	26	9	16	15.71	4	81.0744	13.3094	7.565	0.3157	0.4776	0.906
2018	11	26	9	22	21.19	2.8	81.0761	13.303	13.85	0.6944	0.7377	1.3922
2018	11	26	9	28	38.1	3.5	81.067	13.2957	13.059	0.6563	0.7026	1.3689
2018	11	26	9	27	10.7	3.4	81.0829	13.2763	10.342	0.5615	0.6058	1.3609
2018	11	26	9	35	46.57	2.5	81.0377	13.2401	2.269	1.2332	0.5631	3.5684
2018	11	26	9	44	9.63	3.4	81.0716	13.2835	6.445	0.3108	0.4605	0.898
2018	11	26	9	47	46.01	3.6	81.1066	13.2442	6.849	0.3277	0.4266	0.8906
2018	11	26	9	55	30.78	2.4	81.12	13.3301	23.317	0.8201	0.8343	3.0262
2018	11	26	9	59	49.17	2.5	81.0555	13.2752	12.815	0.6797	0.7324	1.4677
2018	11	26	10	5	54.66	2.9	81.0634	13.2878	10.522	0.6279	0.6841	1.4952
2018	11	26	10	13	23.74	3	81.0474	13.2758	4.903	0.345	0.5154	0.9968
2018	11	26	10	23	37.78	2.8	81.0898	13.2756	12.948	0.7207	0.7627	1.5403
2018	11	26	10	24	28.74	3	81.1861	13.2767	20.203	0.9064	0.8659	1.508
2018	11	26	10	40	19.3	2.8	81.0383	13.275	6.953	0.3628	0.5453	1.0541
2018	11	26	10	41	22.19	2.1	81.474	13.4843	36.694	1.8694	1.6515	1.3963
2018	11	26	10	52	44.83	2.5	81.0798	13.3138	12.986	0.7011	0.7467	1.4382
2018	11	26	11	15	5.19	2.7	81.0583	13.2788	4.648	0.326	0.4851	0.9414
2018	11	26	11	20	52.54	2.7	81.0769	13.2708	10.52	0.616	0.6659	1.4952
2018	11	26	11	22	43.63	2.4	81.1917	13.4486	35.086	1.1708	1.1767	1.6465
2018	11	26	11	50	28.65	4.4	81.0857	13.3071	16.253	0.7049	0.7371	1.2337
2018	11	26	11	57	31.3	2.4	81.0358	13.2936	4.031	0.3634	0.553	1.0447
2018	11	26	12	7	7.14	2.4	81.148	13.334	24.703	0.8156	0.8464	1.5544
2018	11	26	12	12	52.96	2.9	81.2191	13.3699	31.408	1.1219	1.0895	1.5745
2018	11	26	12	33	31.88	3	81.1247	13.3382	13.276	0.7699	0.8002	1.4765
2018	11	26	12	57	29.95	2.3	81.1777	13.2995	32.781	1.2905	1.2508	2.4248
2018	11	26	13	13	31.51	3.1	81.0915	13.3102	17.487	0.7344	0.7629	1.2079
2018	11	26	15	20	30.79	2.8	81.2004	13.2594	15.116	0.7227	0.7118	1.1727
2018	11	26	16	8	47.16	2.6	81.3141	13.2491	17.202	1.0115	0.951	1.1661
2018	11	26	16	23	1.91	3	81.0792	13.2944	11.876	0.645	0.6913	1.427
2018	11	26	16	28	21.96	2.4	81.0919	13.3172	17.44	0.7649	0.7947	1.2555
2018	11	26	17	7	8.42	3.3	81.1246	13.3496	28.373	0.9512	0.9684	2.317
2018	11	26	17	50	22.37	2.3	81.1498	13.3746	31.771	1.2944	1.3034	2.4253
2018	11	26	18	17	34.47	2.5	81.1538	13.2651	13.826	0.7321	0.754	1.6988
2018	11	26	18	27	44.84	2.7	81.2566	13.3786	30.88	1.1806	1.1262	1.3968
2018	11	26	18	34	28.99	2.7	81.1084	13.3064	12.923	0.6391	0.6703	1.3055
2018	11	26	18	45	54.97	2.5	81.1274	13.2832	14.074	0.6293	0.648	1.2171
2018	11	26	18	54	9.72	2.8	81.1101	13.2653	6.049	0.3306	0.4422	0.9059
2018	11	26	18	57	45.63	3	81.0917	13.2579	8.741	0.937	0.4573	2.8581
2018	11	26	19	4	11.66	2.3	81.1832	13.3585	28.693	0.9074	0.8945	1.6537
2018	11	26	19	42	16.2	2.6	81.3315	13.2907	25.392	1.0555	0.97	1.2928
2018	11	26	19	44	27.37	2.2	81.0699	13.2954	2.661	0.3728	0.5537	0.364
2018	11	26	19	51	6.9	2	81.2989	13.5041	46.626	2.5027	2.4409	2.5211
2018	11	26	20	7	18.02	2.9	81.0828	13.3186	17.872	0.7713	0.8036	1.2486
2018	11	26	20	16	23.49	2.2	81.1516	13.2798	15.473	0.7213	0.7324	1.2691
2018	11	26	22	13	14.54	3	81.1192	13.34	18.249	0.9808	0.984	2.201
2018	11	26	22	23	29.7	2.4	81.2041	13.393	30.103	1.0491	1.0286	1.5688
2018	11	26	23	4	21.92	2.8	81.1183	13.2569	12.179	0.8385	0.8832	1.9784
2018	11	26	23	8	2.91	3.6	81.0987	13.2656	12.136	0.5909	0.6239	1.3113
2018	11	26	23	13	41.74	3	81.1624	13.3236	17.017	0.7607	0.7607	1.1266
2018	11	26	23	27	44.22	3	81.1094	13.2742	13.627	0.5622	0.5857	1.1335
2018	11	26	23	45	51.97	2.5	81.1815	13.2674	10.926	1.2595	0.4236	3.3407
2018	11	27	0	3	24.86	2.4	81.1623	13.3884	33.15	1.0589	1.0638	1.8088
2018	11	27	1	17	44.74	4.9	81.129	13.2964	17.626	0.7125	0.7396	1.1417
2018	11	27	2	38	50.46	2.8	81.1891	13.383	23.661	1.0879	1.0749	2.082
2018	11	27	3	28	52.66	2.4	81.1319	13.278	16.553	0.6521	0.6649	1.1226
2018	11	27	4	33	44.09	2.7	81.2065	13.3263	27.415	1.1437	1.1071	2.0796
2018	11	27	4	51	15.19	3.7	81.1448	13.2712	13.608	0.6763	0.6889	1.3216
2018	11	27	5	18	20.52	2.8	81.0901	13.2544	6.023	0.3134	0.4457	0.9203
2018	11	27	6	28	14.7	2.6	81.1275	13.2923	16.368	0.7942	0.8134	1.3683
2018	11	27	7	24	55.17	3.4	81.2225	13.2063	9.162	1.2976	0.3569	2.9517
2018	11	27	9	25	48.97	3	81.2151	13.3347	28.824	0.9499	0.916	1.5265
2018	11	27	11	8	2.42	2.4	81.0924	13.2638	12.216	0.5576	0.5899	1.2243
2018	11	27	11	46	51.3	2.6	81.3057	13.3992	37.151	2.0804	1.9357	2.0116
2018	11	27	12	23	34.27	2.4	81.0762	13.2914	16.118	0.7282	0.7662	1.3221
2018	11	27	12	33	52.69	2.3	81.1746	13.3123	17.17	0.8863	0.8806	1.2589
2018	11	27	14	43	10.31	2.6	81.0977	13.2478	10.567	1.1365	0.5274	3.4013
2018	11	27	15	32	2.64	3.1	81.0934	13.2813	5.187	0.2774	0.4035	0.8037
2018	11	27	20	26	53.43	2.8	81.0752	13.2784	5.141	0.3408	0.5337	1.3338
2018	11	27	20	49	5.22	2.9	81.1382	13.3326	18.352	0.8085	0.8179	1.176
2018	11	27	22	57	40.74	3	81.185	13.3112	25.681	0.9531	0.9338	2.1509
2018	11	28	2	6	1.63	2.7	81.2168	13.265	29.944	0.9787	0.9185	1.7957
2018	11	28	3	24	33.44	3.3	81.2156	13.1904	6.206	0.4082	0.3941	1.0153
2018	11	28	6	29	27.32	2.4	81.5111	13.3699	31.502	1.7055	1.4031	1.1594
2018	11	28	6	35	26.12	2.8	81.5341	13.4186	30.892	2.7458	2.3263	1.9183
2018	11	28	6	55	43.87	2.5	81.09	13.2822	6.256	0.3258	0.4786	0.9562
2018	11	28	7	50	18.63	2.4	81.4158	13.1812	19.605	2.3818	0.8575	3.5497
2018	11	28	7	57	34.58	2.5	81.1547	13.2645	16.179	0.8118	0.8183	1.4103
2018	11	28	10	3	38.72	2.3	81.2322	13.2537	7.258	0.5118	0.5023	0.4403
2018	11	28	10	43	50.53	3.2	81.1859	13.2785	16.038	0.6999	0.7071	1.1119
2018	11	28	10	52	53.31	3	81.3017	13.1986	1.538	0.5102	0.3649	0.4214
2018	11	28	12	16	53.49	2.9	81.1457	13.3012	17.784	0.7672	0.7739	1.1783
2018	11	28	14	20	43.42	2.7	81.1979	13.3181	26.786	0.8861	0.8599	1.6955
2018	11	28	15	37	16.17	3	81.217	13.2906	15.964	0.7804	0.7561	1.128
2018	11	28	16	2	58.46	3.1	81.1239	13.282	5.896	0.3225	0.434	0.8856
2018	11	29	3	12	37.21	2.1	81.1664	13.3439	26.688	1.0442	1.0354	2.2206
2018	11	29	4	5	50.08	2.2	81.3802	13.3167	29.644	1.3088	1.1618	1.1441
2018	11	29	4	29	2.53	2	81.2003	13.3974	45.311	2.1752	2.1572	2.9345
2018	11	29	4	42	37.72	2.9	81.1152	13.2851	14.341	0.6052	0.6267	1.155
2018	11	29	4	49	30.41	4.3	81.3363	13.2825	24.487	0.7936	0.7662	1.0925
2018	11	29	5	8	45.3	2	81.3516	13.2746	17.082	1.318	1.2162	1.2296
2018	11	29	5	58	56.3	2.1	81.1123	13.2622	7.344	1.1667	0.5363	3.5145
2018	11	29	7	49	40.47	2.7	81.1389	13.268	4.086	0.4077	0.53	1.1394
2018	11	29	13	44	4.32	3	81.1227	13.2654	12.247	0.5649	0.5986	1.2338
2018	11	29	17	58	53.93	3.4	81.1739	13.2384	4.908	0.2975	0.3342	0.7883
2018	11	30	6	10	54.49	2.7	81.0828	13.2936	15.441	0.6761	0.7103	1.2503
2018	11	30	7	30	32.17	3.5	81.1149	13.3631	26.014	0.8423	0.8698	2.4213
2018	11	30	7	29	2.38	2.4	81.0827	13.3191	16.719	0.7915	0.8278	1.3518
2018	11	30	16	54	9.24	3.4	81.1605	13.2633	12.705	0.6353	0.6446	1.2991
2018	11	30	18	26	10.14	3	81.0952	13.2879	3.835	0.3084	0.4508	0.9017
2018	11	30	22	34	0.2	2.8	81.2052	13.305	20.57	0.95	0.93	1.1157
2018	12	1	4	20	5.45	2	81.5557	13.4353	16.745	1.7071	1.4399	1.2426
2018	12	1	8	34	30.23	2.4	81.2516	13.2092	4.082	0.3403	0.3116	0.3309
2018	12	1	15	38	10.58	2.1	81.3124	13.2361	14.241	1.1346	1.0543	1.2291
2018	12	1	23	38	20.11	2.5	81.1034	13.263	9.566	1.0088	0.4856	3.0825
2018	12	1	23	59	32.99	2.7	81.3698	13.2572	20.877	0.9826	0.9336	0.7919
2018	12	2	14	16	44.35	2.6	81.1791	13.2622	14.488	0.7204	0.7174	1.3266
2018	12	2	17	51	36.23	2.1	81.2944	13.2754	20.557	0.909	0.8493	0.8366
2018	12	2	20	59	52.06	2.8	81.1815	13.2817	14.484	0.7958	0.7969	1.4947
2018	12	3	10	14	30.42	3.6	81.0796	13.3093	14.504	0.663	0.7038	1.2533
2018	12	3	23	47	11.04	3.1	81.0953	13.2877	8.538	0.3509	0.4936	1.028
2018	12	4	3	53	3.5	2.8	81.3107	13.2309	17.767	0.9065	0.8904	1.1051
2018	12	4	9	7	30.41	3.2	81.336	13.2174	15.817	1.1222	1.0401	1.3886
2018	12	4	15	14	16.51	3	81.0663	13.294	14.331	0.6947	0.7397	1.3722
2018	12	5	4	26	32.66	2.2	81.1742	13.3885	34.825	1.1619	1.1623	1.8305
2018	12	5	8	50	38.33	2.7	81.346	13.1918	2.353	0.5925	0.3671	0.4182
2018	12	5	10	32	15.71	2.4	81.3573	13.1811	5.239	0.6469	0.4298	1.1543
2018	12	5	13	58	32.34	3.7	81.346	13.1978	2.848	0.5519	0.342	0.3898
2018	12	5	14	11	16.35	4	81.3707	13.1452	10.796	0.9991	0.5166	1.5225
2018	12	5	21	1	56.29	2.8	81.2102	13.2183	8.815	0.9251	0.4198	2.439
2018	12	6	18	26	54.63	3.7	81.0741	13.2878	12.315	0.6621	0.7095	1.4469
2018	12	7	0	4	3.12	2.3	81.1217	13.2712	18.83	0.9228	0.9427	1.4406
2018	12	7	10	28	58.17	2.9	81.1031	13.3076	17.776	0.8135	0.8402	1.3239
2018	12	7	18	5	20.98	2.8	81.1425	13.3043	17.115	0.7587	0.7675	1.1972
2018	12	7	18	57	0.84	3	81.1573	13.3619	32.97	0.9871	0.9893	1.8057
2018	12	7	19	2	46.55	2.3	81.3776	13.4019	34.885	1.3	1.1713	0.9809
2018	12	8	2	22	4.09	2.5	81.4066	13.2784	20.236	1.4447	1.2867	0.8429
2018	12	9	6	18	32.23	2.2	81.4529	13.5463	20.153	1.6827	1.4955	1.1274
2018	12	9	12	35	27.63	2.5	81.3169	13.4148	26.564	1.085	1.0132	0.9314
2018	12	9	21	44	50.72	2.3	81.4341	13.3813	32.574	1.3738	1.2063	0.9281
2018	12	10	2	18	30.2	2.3	80.9018	13.3389	15.538	0.8347	0.9531	1.6699
2018	12	10	3	6	40.12	2.3	81.4027	13.266	20.734	1.1491	1.0492	0.7631
2018	12	10	7	10	59.09	2.6	81.2429	13.3411	26.451	0.9714	0.9291	1.414
2018	12	10	7	59	10.08	2.6	81.1041	13.271	3.384	0.3942	0.5481	0.3872
2018	12	12	6	7	20.91	2.6	81.3067	13.2246	16.901	1.0915	1.0291	1.3541
2018	12	12	11	15	22.11	2.6	81.3822	13.2067	16.737	1.2671	1.1357	1.3079
2018	12	12	20	50	46.15	2.7	81.1096	13.2852	12.954	0.6427	0.6728	1.3449
2018	12	14	7	41	45.54	3.8	81.3176	13.1874	12.412	0.9601	0.4522	1.5265
2018	12	15	11	28	9.11	2.7	81.326	13.207	15.579	1.089	1.0114	1.4464
2018	12	15	22	12	14.31	2.9	81.4456	13.4094	32.377	1.5052	1.328	1.003
2018	12	16	4	41	55.2	3.3	81.3877	13.2844	26.968	1.17	1.0302	1.1698
2018	12	16	4	42	33.3	3.7	81.3367	13.2373	19.014	1.1522	1.0694	1.1143
2018	12	18	6	4	23.64	2.5	81.0567	13.2989	12.442	0.7307	0.7893	1.5796
2018	12	20	0	18	40.79	2.5	81.4286	13.2452	17.928	1.6816	1.4585	1.0257
2018	12	20	18	43	51.82	3	81.2905	13.211	14.187	0.8708	0.4062	1.409
2018	12	21	5	1	57.42	2	81.1294	13.306	20.081	0.7359	0.7461	1.044
2019	1	2	3	28	25.73	2.5	81.2852	13.2178	12.075	1.234	0.7077	1.6398
2019	1	9	14	46	55.31	2.6	81.3471	13.2435	17.374	1.8112	1.5922	1.7031
2019	1	11	6	3	23.36	2.4	81.0501	13.2763	12.062	2.153	1.9948	3.9687
2019	1	13	8	10	1.91	2.7	81.2156	13.4055	34.688	2.4826	2.3219	2.3409
2019	1	13	8	31	47.75	2.3	81.1851	13.3277	22.09	2.087	1.9632	1.9297
2019	1	14	18	46	35.69	2.3	81.2576	13.3946	36.269	3.3721	2.9764	2.7783
2019	1	14	21	23	44.21	2.9	81.149	13.2823	17.996	1.6796	1.5799	2.1533
2019	1	20	23	26	53.87	3.3	81.2525	13.2336	70.609	3.3873	2.0286	9.1664
2019	2	15	6	34	0.01	2	81.0931	13.1964	4.348	1.7562	1.4878	1.2266
2019	3	8	5	38	0.35	2.6	81.2493	13.2689	30.268	2.2505	1.9597	3.0536
2019	3	22	9	46	59.68	3.1	81.2936	13.2409	20.82	2.3119	1.9721	2.2101
2019	3	23	9	20	24.85	2.3	81.1983	13.244	21.279	4.1524	3.5842	4.412
2019	4	21	3	8	56.49	2.8	81.0717	13.282	14.872	0.7214	0.7643	1.4024
2019	4	21	4	15	15.97	2.3	81.0512	13.2752	8.445	0.3511	0.5251	1.0169
2019	4	21	6	15	9.68	2.3	81.08	13.3045	14.941	0.6957	0.7328	1.301
2019	4	24	10	52	26.29	2.5	81.513	13.2976	18.483	1.6608	1.3838	0.7399
2019	4	25	2	9	21.27	2.2	81.2711	13.2225	16.144	0.9083	0.8769	1.3328
2019	4	27	15	4	6.09	2.3	81.1588	13.2377	11.222	1.2391	0.3647	2.9094
2019	5	13	18	6	4.85	2.3	81.1504	13.2326	6.432	0.3282	0.3861	0.8806
2019	5	22	18	58	8.56	2.3	81.3958	13.165	12.821	1.8361	1.0948	2.2911
2019	6	6	12	13	8.75	2.1	81.3468	13.1341	3.796	1.7699	0.9936	2.4237
2019	6	12	1	44	44.75	2.9	81.2431	13.4195	26.345	2.2331	2.075	2.1748
2019	6	25	19	18	53.25	2.8	81.3827	13.397	35.99	2.6612	2.4053	1.9473
